# Supplementary material for: Diagnostic Precursors to Bipolar Disorder in Offspring of Parents With Bipolar Disorder: A Longitudinal Study
Source: Atypon-hosted journal article supplement (doi:10.1176/appi.ajp.2014.14010035), 2015-03-03
Supplement: appi.ajp.2014.14010035.ds001.pdf [file appi.ajp.2014.14010035.ds001.pdf]

## Supplemental Tables S1–S5

**TABLE S1. Comparison of Intake Factors for Offspring With and Without Follow-Up Assessments<sup>a</sup>**

|                                                   | Offspring Without<br>Follow-Up<br>(N=58) | Offspring With<br>Follow-Up<br>(N=581) | F    | p     |
|---------------------------------------------------|------------------------------------------|----------------------------------------|------|-------|
| <b><i>Demographics (at Intake)</i></b>            |                                          |                                        |      |       |
| Age                                               | 11.5±3.8                                 | 11.9±3.6                               | 0.24 | 0.6   |
| Sex (% Female)                                    | 50.0%                                    | 51.0%                                  | 0.02 | 0.9   |
| Race (% White)                                    | 62.1%                                    | 80.0%                                  | 3.96 | 0.05  |
| Living status (% with both biological<br>parents) | 27.6%                                    | 51.8%                                  | 7.02 | 0.008 |
| Socioeconomic status                              | 29.2±9.4                                 | 35.7±13.9                              |      |       |
| Mother's age at offspring's birth                 | 24.3±5.0                                 | 27.6±5.8                               | 9.60 | 0.002 |
| Father's age at offspring's birth                 | 25.7±6.2                                 | 30.2±7.4                               | 9.54 | 0.002 |
| <b><i>Diagnoses (Lifetime at Intake)</i></b>      |                                          |                                        |      |       |
| Bipolar-I disorder                                | 0.0%                                     | 2.8%                                   | —    | —     |
| Bipolar-spectrum disorder                         | 8.6%                                     | 12.9%                                  | 0.79 | 0.4   |
| Major depressive episode                          | 13.8%                                    | 26.5%                                  | 3.72 | 0.05  |
| Attention-deficit hyperactivity disorder          | 27.6%                                    | 25.7%                                  | 0.09 | 0.8   |
| Oppositional defiant disorder                     | 19.0%                                    | 20.7%                                  | 0.11 | 0.7   |
| Conduct disorder                                  | 6.9%                                     | 8.1%                                   | 0.10 | 0.8   |
| Any anxiety disorder                              | 20.7%                                    | 34.1%                                  | 3.88 | 0.05  |
| Substance use disorder                            | 3.5%                                     | 17.4%                                  | 5.69 | 0.02  |
| <b><i>Lifetime History (at Intake)</i></b>        |                                          |                                        |      |       |
| Physical abuse                                    | 6.9%                                     | 5.3%                                   | 0.24 | 0.6   |
| Sexual abuse                                      | 6.9%                                     | 7.1%                                   | 0.00 | 1.0   |

<sup>a</sup> Model adjusted for within-family correlation

**TABLE S2. Parent Proband Factors**

|                                                | Parents With Bipolar Disorder (N=236) | Community Control Parents (N=141) | Statistic       | p       |
|------------------------------------------------|---------------------------------------|-----------------------------------|-----------------|---------|
| <b>Demographics (at Intake)</b>                |                                       |                                   |                 |         |
| Sex (% Female)                                 | 80.5%                                 | 77.3%                             | $\chi^2=0.55$   | 0.5     |
| Race (% White)                                 | 88.1%                                 | 75.9%                             | $\chi^2=9.64$   | 0.002   |
| Marital status (% married)                     | 48.3%                                 | 66.0%                             | $\chi^2=11.11$  | 0.0009  |
| Socioeconomic status                           | 34.3±14.4                             | 37.2±12.9                         | $\chi^2=4.07$   | 0.04    |
| Age                                            | 39.3±7.6                              | 41.1±7.3                          | t=2.20          | 0.03    |
| Number of offspring in study                   | 1.95±1.0                              | 2.08±0.9                          | t=1.14          | 0.26    |
| <b>Diagnoses (Lifetime at last assessment)</b> |                                       |                                   |                 |         |
| Bipolar-I disorder                             | 72.0%                                 | —                                 | —               | —       |
| Bipolar-II disorder                            | 28.0%                                 | —                                 | —               | —       |
| Major depressive episode                       | 93.2%                                 | 34.8%                             | $\chi^2=147.62$ | <0.0001 |
| Any nonbipolar Axis I disorder                 | 98.7%                                 | 61.0%                             | $\chi^2=96.55$  | <0.0001 |
| Any nonmood Axis I Disorder                    | 90.3%                                 | 50.4%                             | $\chi^2=75.62$  | <0.0001 |
| Any anxiety disorder                           | 76.7%                                 | 28.4%                             | $\chi^2=84.98$  | <0.0001 |
| Panic disorder                                 | 46.2%                                 | 9.2%                              | $\chi^2=55.11$  | <0.0001 |
| Generalized anxiety disorder                   | 41.1%                                 | 5.7%                              | $\chi^2=55.13$  | <0.0001 |
| Attention-deficit hyperactivity disorder       | 26.3%                                 | 3.6%                              | $\chi^2=31.2$   | <0.0001 |
| Oppositional defiant disorder/conduct disorder | 36.9%                                 | 7.1%                              | $\chi^2=40.94$  | <0.0001 |
| Substance use disorder                         | 65.7%                                 | 29.1%                             | $\chi^2=47.37$  | <0.0001 |

**TABLE S3. Biological Coparent Factors**

|                                                | Coparents of Probands With Bipolar Disorder (N=298)              | Community Control Coparents (N=186)              | Stat           | p      |
|------------------------------------------------|------------------------------------------------------------------|--------------------------------------------------|----------------|--------|
| <b>Demographics</b>                            |                                                                  |                                                  |                |        |
| Sex (% Female)                                 | 20.1%                                                            | 21.0%                                            | $\chi^2=0.05$  | 0.8    |
| Race (% White)                                 | 67.1%                                                            | 66.7%                                            | $\chi^2=0.01$  | 0.9    |
| Age                                            | 40.7±8.1                                                         | 40.3±7.1                                         | t=0.55         | 0.58   |
| SCID Assessment (%)                            | 29.2%                                                            | 33.9%                                            | $\chi^2=1.17$  | 0.3    |
|                                                | Coparents of Probands With Bipolar Disorder (N=274) <sup>a</sup> | Community Control Coparents (N=165) <sup>b</sup> | Stat           | p      |
| <b>Diagnoses (Lifetime at last assessment)</b> |                                                                  |                                                  |                |        |
| Any axis I disorder                            | 48.5%                                                            | 31.5%                                            | $\chi^2=12.24$ | 0.0005 |
| Any psychotic disorder                         | 1.8%                                                             | 0.6%                                             | $\chi^2=1.1$   | 0.29   |
| Any depressive disorder                        | 23.0%                                                            | 14.5%                                            | $\chi^2=4.63$  | 0.03   |
| Bipolar-spectrum disorders                     | 4.0%                                                             | —                                                | —              | —      |
| Any anxiety disorder                           | 11.7%                                                            | 13.9%                                            | $\chi^2=0.48$  | 0.49   |
| Attention-deficit hyperactivity disorder       | 2.6%                                                             | 2.4%                                             | $\chi^2=0.01$  | 0.93   |
| Oppositional defiant or conduct disorders      | 5.5%                                                             | 2.4%                                             | $\chi^2=2.31$  | 0.13   |
| Substance use disorder                         | 31.0%                                                            | 17.6%                                            | $\chi^2=9.69$  | 0.002  |

<sup>a</sup> 24 coparents of probands with bipolar disorder did not have any available diagnostic information

<sup>b</sup> 21 community control coparents did not have any available diagnostic information

**TABLE S4. Association of Potential Confounding Variables With Hazard to Develop Subsequent Manic/Hypomanic Episodes in High-Risk Offspring<sup>a</sup>**

|                                                                      | New Onset<br>Manic/Hypomanic<br>Episode (N=36) | No Manic/<br>Hypomanic<br>Episode<br>(N=355) | Hazard<br>Ratio | 95% CI     | $\chi^2$ | p     |
|----------------------------------------------------------------------|------------------------------------------------|----------------------------------------------|-----------------|------------|----------|-------|
| Offspring Age at intake (years)                                      | 12.6±2.8                                       | 11.9±3.7                                     | 0.95            | 0.86, 1.05 | 1.1      | 0.29  |
| Offspring Age at last assessment<br>(years)                          | 19.5±3.6                                       | 18.0±4.9                                     | 0.95            | 0.87, 1.05 | 1.0      | 0.32  |
| Date of Intake (year)                                                | 2003.94±1.6                                    | 2003.91±1.5                                  | 1.08            | 0.87, 1.35 | 0.5      | 0.47  |
| Number of assessments                                                | 3.9±1.2                                        | 3.7±1.3                                      | 0.95            | 0.72, 1.26 | 0.1      | 0.73  |
| Duration of follow-up (years)                                        | 7.3±1.7                                        | 6.7±2.3                                      | 1.00            | 0.87, 1.14 | 0.0      | 0.6   |
| 1st follow-up within 2 years of<br>intake (% Yes)                    | 77.8%                                          | 78.6%                                        | 0.76            | 0.34, 1.66 | 0.5      | 0.48  |
| 2nd follow-up within 3 years of<br>intake (% Yes)                    | 69.4%                                          | 62.8%                                        | 1.06            | 0.52, 2.16 | 0.0      | 0.86  |
| Offspring sex (% Female)                                             | 52.8%                                          | 48.4%                                        | 1.18            | 0.61, 2.26 | 0.2      | 0.63  |
| Socioeconomic status                                                 | 34.8±14.7                                      | 33.7±14.0                                    | 1.00            | 0.98, 1.02 | 0.0      | 0.99  |
| Offspring race (% White)                                             | 86.1%                                          | 80.6%                                        | 1.29            | 0.50, 3.32 | 0.3      | 0.60  |
| Lives with both biological parents<br>(% Yes)                        | 30.6%                                          | 42.8%                                        | 0.55            | 0.27, 1.13 | 2.7      | 0.10  |
| Proband parent sex (% Female)                                        | 97.2%                                          | 81.7%                                        | 8.69            | 1.19, 63.5 | 4.5      | 0.03  |
| Proband parent age at onset of<br>proband's bipolar disorder (years) | 17.6±8.7                                       | 19.6±8.7                                     | 0.96            | 0.92, 1.00 | 3.4      | 0.06  |
| Proband parent bipolar type (%<br>Bipolar I disorder)                | 66.7%                                          | 70.4%                                        | 0.88            | 0.44, 1.77 | 0.1      | 0.73  |
| Proband age at intake assessment<br>(years)                          | 37.5±6.8                                       | 38.9±7.2                                     | 0.93            | 0.88, 0.98 | 7.8      | 0.005 |

<sup>a</sup> Cox regression models

**TABLE S5. Association Comparing Single Versus Comorbid Prior Mood Episodes and/or Diagnoses in Hazard to Develop Subsequent Manic/Hypomanic Episodes in Offspring of Parents With Bipolar Disorder<sup>a</sup>**

| Diagnoses                                                                    | Hazard Ratio | p      |
|------------------------------------------------------------------------------|--------------|--------|
| Subthreshold hypo/manic episode                                              | 3.76         | 0.0001 |
| Subthreshold hypo/manic episode and disruptive behavior disorder             | 4.93         | 0.0002 |
| Subthreshold hypo/manic episode and any depressive episode                   | 3.05         | 0.003  |
| Subthreshold hypo/manic episode and major depressive episode                 | 3.66         | 0.001  |
| Subthreshold hypo/manic episode and attention-deficit hyperactivity disorder | 3.25         | 0.009  |
| Subthreshold hypo/manic episode and anxiety disorder                         | 3.47         | 0.001  |
| Any depressive episode                                                       | 2.50         | 0.01   |
| Any depressive episode and disruptive behavior disorder                      | 1.76         | 0.13   |
| Any depressive episode and attention-deficit hyperactivity disorder          | 1.98         | 0.07   |
| Any depressive episode and anxiety disorder                                  | 2.06         | 0.03   |
| Major depressive episode                                                     | 2.58         | 0.005  |
| Major depressive episode and anxiety disorder                                | 2.59         | 0.005  |
| Major depressive episode and attention-deficit hyperactivity disorder        | 2.48         | 0.02   |
| Major depressive episode and disruptive behavior disorder                    | 2.51         | 0.02   |
| Disruptive behavior disorder                                                 | 2.85         | 0.002  |
| Disruptive behavior disorder and attention-deficit hyperactivity disorder    | 2.77         | 0.007  |
| Disruptive behavior disorder and anxiety disorder                            | 2.43         | 0.02   |
| Attention-deficit hyperactivity disorder                                     | 2.04         | 0.03   |
| Attention-deficit hyperactivity disorder and anxiety disorder                | 2.23         | 0.04   |
| Anxiety disorder                                                             | 1.86         | 0.06   |

<sup>a</sup> Cox regression models
